# Supplementary material for: Effect of digested chia seed protein on the gut microbiota and colon morphology of mice fed a high-saturated-fat diet
Source: Royal Society of Chemistry journal article supplement (doi:10.1039/d4fo02199a), 2024-01-01
Supplement: d4fo02199a1.pdf [file d4fo02199a1.pdf]

Supplementary material

Table S1. Main bioactive peptides found in digested protein from chia seeds.

| Peptide             | Molecular mass (Da) | Potential biological activity | Sequence                                               |
|---------------------|---------------------|-------------------------------|--------------------------------------------------------|
| NPGGGAPSGH          | 849.37              | antiamnestic                  | PG                                                     |
|                     |                     | ACE inhibitor                 | AP, GA, GH, GG, SG, PG                                 |
|                     |                     | antithrombotic                | PG                                                     |
|                     |                     | regulating                    | PG                                                     |
| HYGGPPGGCR          | 999.43              | DPP-IV inhibitor              | AP, GA, NP,GG                                          |
|                     |                     | antioxidative                 | GH, PG, PS                                             |
|                     |                     | antiamnestic                  | PG, GP                                                 |
|                     |                     | ACE inhibitor                 | HY, YG, GP, GG, PG, YGG, GPP,PP                        |
|                     |                     | antithrombotic                | GP, PG                                                 |
|                     |                     | immunomodulating              | YG, YGG                                                |
| LHNGGPPGGEY         | 999.43              | regulating                    | GP, PG                                                 |
|                     |                     | antioxidative                 | GPP                                                    |
|                     |                     | DPP-IV inhibitor              | GP,PP, PPG, GG, HY, PG, YG                             |
|                     |                     | antiamnestic                  | GPGG, PG, GP                                           |
|                     |                     | ACE inhibitor                 | GP, GE, GG, NG, PG, EY                                 |
|                     |                     | antithrombotic                | GP, PG, GPGG                                           |
| DVNPGGPAPHPPWLSVNDL | 1980.96             | regulating                    | GP, PG, GPGG                                           |
|                     |                     | antioxidative                 | LH, LHN,GGE                                            |
|                     |                     | DPP-IV inhibitor              | GP, EY, GE, GG, LH, NG, PG                             |
|                     |                     | antiamnestic                  | PG, GP                                                 |
|                     |                     | ACE inhibitor                 | GPA, GP, AP, GG, PG, PAP, PP, HP, PH, VNP, WL          |
|                     |                     | antithrombotic                | GP, PG                                                 |
| TGPPRPALVFPHAVVP    | 1653.96             | regulating                    | GP, PG                                                 |
|                     |                     | antioxidative                 | PWL, PW                                                |
|                     |                     | DPP-IV inhibitor              | GP, PP, AP, PA, HP, GPA, NP, WL, GG, ND, PG, PH, PW,SV |
|                     |                     | antiamnestic                  | GP                                                     |
|                     |                     | ACE inhibitor                 | VF, FP, PR, GP, RP, VP, TG, GPP, PP, PH, AV, TGP, AVV  |
|                     |                     | antithrombotic                | GP                                                     |
|                     | stimulating         | LV                            |                                                        |
|                     | regulating          | GP                            |                                                        |

|                    |         |                                                                                                                       |                                                                                                                                    |
|--------------------|---------|-----------------------------------------------------------------------------------------------------------------------|------------------------------------------------------------------------------------------------------------------------------------|
|                    |         | antioxidative inhibitor<br>DPP-IV inhibitor                                                                           | PHA, GPP<br>PPRP<br>GP, PP, PA, VP, VV, HA, FP, RP, AL, AV, LV, PH, TG, VR                                                         |
| NSSAQYSDPFLALH     | 1548.71 | ACE inhibitor<br>antioxidative<br>Activating UBMP<br>DPP-IV inhibitor                                                 | LA<br>LH<br>LA<br>LA, FL, AL, DP, LH, PF, QY, YS                                                                                   |
| LPVFGGLAAEGNVVTYLH | 1798.95 | ACE inhibitor<br><br>neuropeptide<br>antioxidative<br>Activating UBMP<br>DPP-IV inhibitor                             | VF, LAA, YL, LA, AA, GL, FG, EG<br>YL<br>LH, TY<br>LA<br>LA, LP, VV, GL, AA, AE, EG, LH, NV, PV, TY, VF, VT, YL                    |
| TPPGVGGFPWGGAMLGAQ | 1698.91 | antiamnestic<br>ACE inhibitor<br><br>antithrombotic<br>regulating<br>antioxidative<br>DPP-IV inhibitor                | PG<br>FP, GF, VG, GA, GV, WG, GG, LG, PG, PP, TP<br>PG<br>PG<br>PWG, PW, WG<br>PP, TP, FP, GA, PPG, WG, GF, GG, GV, ML, PG, PW, VG |
| APSPPVLGPP         | 930.52  | antiamnestic<br>ACE inhibitor<br><br>antithrombotic<br>stimulating<br>regulating<br>antioxidative<br>DPP-IV inhibitor | GP<br>LGP, GP, AP, LG, GPP, PP<br>GP<br>VL<br>GP<br>GPP<br>GP, PP, SP, VLGP, PS, PV, VL                                            |

Peptides sequenced by HPLC ESI-MS/MS with intensity at least 90%. Only sequences with antioxidative peptides (BIOPEP® database) are presented in the table. ACE inhibitor: angiotensin-converting-enzyme inhibitor; DPP IV inhibitor: dipeptidyl peptidase IV inhibitor; Activating UBMP: Activating ubiquitin-mediated proteolysis. Regulation: peptide regulating the stomach mucosal membrane activity. Stimulation: Stimulating vasoactive substance release or glucose uptake stimulating peptide. The amino acids are presented in one letter nomenclature.

1 **Table S2.** Sequencing data at the end of 8 weeks of treatment, according to each  
 2 experimental group.

| Groups  | Good's coverage | Raw       | After filtering and |         | Normalized reads |         |
|---------|-----------------|-----------|---------------------|---------|------------------|---------|
|         |                 | Sequences | cleanup             |         | Reads            | OTUs    |
|         |                 | Reads     | Reads               | OTUs    | Reads            | OTUs    |
| AIN     | 0.9991 ±        | 174577 ±  | 92736 ±             | 286 ±   | 63108.56         | 286 ±   |
|         | 0.0002          | 13417     | 9850.51             | 28.75   | ± 8.69           | 28.75   |
| HF      | 0.9992 ±        | 167716 ±  | 91985.5 ±           | 275.9 ± | 63115 ±          | 275,9 ± |
|         | 0.0002          | 8345      | 12153.81            | 37.05   | 7.32             | 37.05   |
| AIN+DTP | 0.9991 ±        | 169630 ±  | 85716.3 ±           | 272.1 ± | 63106.9          | 272,1 ± |
|         | 0.0003          | 12472     | 10245.51            | 23.82   | ± 5.28           | 23.82   |
| HF+DTP  | 0.9991 ±        | 167808 ±  | 80013.1 ±           | 272.9 ± | 63110,1          | 272,9 ± |
|         | 0.0003          | 11758     | 10850.85            | 32.95   | ± 7.50           | 32.95   |

3 Values expressed as mean ± standard deviation, n=10 animals/group. AIN: normal diet  
 4 group; HF: high-fat diet group; AIN+DTP: Normal diet plus digested protein from chia  
 5 seed group; HF+DTP: high-fat diet plus digested protein from chia seed group; OUTs:  
 6 Operational Taxonomic Units.

7

8

9

10

11

12 **Table S3.** Relative abundance of different taxonomic levels at the end of 8 weeks of  
 13 treatment, according to each experimental group.

| Classification | Groups                               | AIN                           | HF                            | AIN+DTP                       | HF+DTP                       |
|----------------|--------------------------------------|-------------------------------|-------------------------------|-------------------------------|------------------------------|
|                |                                      | Mean $\pm$ SD                 | Mean $\pm$ SD                 | Mean $\pm$ SD                 | Mean $\pm$ SD                |
| Phylum         | Verrucomicrobiota_filo               | 2.44 $\pm$ 0.54 <sup>a</sup>  | 2.10 $\pm$ 0.65 <sup>a</sup>  | 1.63 $\pm$ 0.34 <sup>b</sup>  | 0.95 $\pm$ 0.28 <sup>c</sup> |
|                | Desulfobacterota_filo                | 2.80 $\pm$ 0.65 <sup>bc</sup> | 2.27 $\pm$ 0.52 <sup>c</sup>  | 2.93 $\pm$ 0.54 <sup>b</sup>  | 4.70 $\pm$ 1.50 <sup>a</sup> |
|                | F_B_filo                             | 6.15 $\pm$ 1.09 <sup>a</sup>  | 7.79 $\pm$ 1.29 <sup>a</sup>  | 6.14 $\pm$ 1.46 <sup>a</sup>  | 7.29 $\pm$ 1.82 <sup>a</sup> |
| Class          | Verrucomicrobiae                     | 2.44 $\pm$ 0.54 <sup>a</sup>  | 2.10 $\pm$ 0.65 <sup>a</sup>  | 1.63 $\pm$ 0.34 <sup>b</sup>  | 0.95 $\pm$ 0.28 <sup>c</sup> |
|                | Desulfovibrionia                     | 2.77 $\pm$ 0.59 <sup>bc</sup> | 2.27 $\pm$ 0.52 <sup>bc</sup> | 2.93 $\pm$ 0.54 <sup>b</sup>  | 4.70 $\pm$ 1.50 <sup>a</sup> |
| Order          | Verrucomicrobiales                   | 2.37 $\pm$ 0.57 <sup>a</sup>  | 2.10 $\pm$ 0.65 <sup>a</sup>  | 1.63 $\pm$ 0.34 <sup>b</sup>  | 0.95 $\pm$ 0.28 <sup>c</sup> |
|                | Desulfovibrionales                   | 2.77 $\pm$ 0.59 <sup>bc</sup> | 2.27 $\pm$ 0.52 <sup>bc</sup> | 2.93 $\pm$ 0.54 <sup>b</sup>  | 4.70 $\pm$ 1.50 <sup>a</sup> |
| Family         | Atopobiaceae                         | 0.74 $\pm$ 0.31 <sup>b</sup>  | 1.93 $\pm$ 0.49 <sup>a</sup>  | 1.48 $\pm$ 0.58 <sup>a</sup>  | 2.05 $\pm$ 0.79 <sup>a</sup> |
|                | Akkermansiaceae                      | 2.29 $\pm$ 0.64 <sup>a</sup>  | 2.10 $\pm$ 0.65 <sup>ab</sup> | 1.63 $\pm$ 0.34 <sup>b</sup>  | 0.95 $\pm$ 0.28 <sup>c</sup> |
|                | Desulfovibrionaceae                  | 2.77 $\pm$ 0.59 <sup>b</sup>  | 2.27 $\pm$ 0.52 <sup>b</sup>  | 2.93 $\pm$ 0.54 <sup>b</sup>  | 4.70 $\pm$ 1.50 <sup>a</sup> |
|                | Rikenellaceae                        | 0.79 $\pm$ 0.25 <sup>c</sup>  | 1.06 $\pm$ 0.27 <sup>b</sup>  | 1.36 $\pm$ 0.26 <sup>a</sup>  | 1.45 $\pm$ 0.29 <sup>a</sup> |
| Genera         | <i>Olsenella</i>                     | 0.66 $\pm$ 0.25 <sup>c</sup>  | 1.25 $\pm$ 0.23 <sup>a</sup>  | 1.00 $\pm$ 0.28 <sup>b</sup>  | 1.30 $\pm$ 0.23 <sup>a</sup> |
|                | <i>Dubosiella</i>                    | 1.38 $\pm$ 0.46 <sup>b</sup>  | 3.27 $\pm$ 2.59 <sup>a</sup>  | 5.03 $\pm$ 1.89 <sup>a</sup>  | 4.89 $\pm$ 1.09 <sup>a</sup> |
|                | <i>Roseburia</i>                     | 0.35 $\pm$ 0.03 <sup>a</sup>  | 0.37 $\pm$ 0.05 <sup>a</sup>  | 0.14 $\pm$ 0.17 <sup>b</sup>  | 0.04 $\pm$ 0.11 <sup>b</sup> |
|                | <i>Akkermansia</i>                   | 2.29 $\pm$ 0.64 <sup>a</sup>  | 2.10 $\pm$ 0.65 <sup>ab</sup> | 1.63 $\pm$ 0.34 <sup>b</sup>  | 0.95 $\pm$ 0.28 <sup>c</sup> |
|                | <i>Oscillospiraceae_unclassified</i> | 1.10 $\pm$ 0.54 <sup>b</sup>  | 0.77 $\pm$ 0.32 <sup>b</sup>  | 0.78 $\pm$ 0.29 <sup>b</sup>  | 1.76 $\pm$ 0.51 <sup>a</sup> |
|                | <i>Alistipes</i>                     | 0.79 $\pm$ 0.25 <sup>c</sup>  | 0.90 $\pm$ 0.20 <sup>b</sup>  | 1.07 $\pm$ 0.15 <sup>ab</sup> | 1.18 $\pm$ 0.13 <sup>a</sup> |

14 Values expressed as mean  $\pm$  standard deviation, n=10 animals/group. AIN: normal diet

15 group; HF: high-fat diet group; AIN+DTP: Normal diet plus digested protein from chia

16 seed group; HF+DTP: high-fat diet plus digested protein from chia seed group.

17

18
